# Supplementary material for: Seasonal Variation in Raw Milk VOC Profile within Intensive Feeding Systems
Source: MDPI journal article supplement (doi:10.3390/foods12091871), 2023-04-30
Supplement: s1 [file s1]

## Supporting information

**Table S1.** The entire milk volatile organic compound profile according to the retention time (RT, min)

| RT    | Assignment                                       | Chemical class  | Formula                                        | Molecular weight |
|-------|--------------------------------------------------|-----------------|------------------------------------------------|------------------|
| 1.43  | Isobutyraldehyde                                 | ALDEHYDE        | C <sub>4</sub> H <sub>8</sub> O                | 72.11            |
| 1.50  | Isopropyl alcohol; Isopropanol                   | ALCOHOL         | C <sub>3</sub> H <sub>8</sub> O                | 60.10            |
| 1.56  | Diacetyl                                         | KETONE          | C <sub>4</sub> H <sub>6</sub> O <sub>2</sub>   | 86.09            |
| 1.61  | Hexane                                           | ALKANE          | C <sub>6</sub> H <sub>14</sub>                 | 86.18            |
| 1.62  | N/A                                              | -               | -                                              | -                |
| 1.65  | 3-Methylbutanal; Isovaleraldehyde                | ALDEHYDE        | C <sub>5</sub> H <sub>10</sub> O               | 86.13            |
| 1.72  | isobutyl alcohol                                 | ALCOHOL         | C <sub>4</sub> H <sub>10</sub> O               | 74.123           |
| 1.88  | Propionic acid, Propanoic acid, Ethylformic acid | CARBOXYLIC ACID | C <sub>3</sub> H <sub>6</sub> O <sub>2</sub>   | 74.08            |
| 1.96  | 2-Pentanol                                       | ALCOHOL         | C <sub>5</sub> H <sub>12</sub> O               | 88.15            |
| 2.09  | N/A                                              | -               | -                                              | -                |
| 2.20  | Isobutyric acid                                  | CARBOXYLIC ACID | C <sub>4</sub> H <sub>8</sub> O <sub>2</sub>   | 88.11            |
| 2.47  | Amyl alcohol, 1-Pentanol                         | ALCOHOL         | C <sub>5</sub> H <sub>12</sub> O               | 88.15            |
| 2.54  | Isobutyl acetate                                 | ESTER           | C <sub>6</sub> H <sub>12</sub> O <sub>2</sub>  | 116.16           |
| 2.64  | Methyl-2-methylbutyrate                          | ESTER           | C <sub>6</sub> H <sub>12</sub> O <sub>2</sub>  | 116.16           |
| 2.81  | 3,4-Hexanedione                                  | KETONE          | C <sub>6</sub> H <sub>10</sub> O <sub>2</sub>  | 114.07           |
| 3.05  | Ethyl lactate                                    | ESTER           | C <sub>5</sub> H <sub>10</sub> O <sub>3</sub>  | 118.13           |
| 3.68  | 2-Hexen-1-ol (trans)                             | ALCOHOL         | C <sub>6</sub> H <sub>12</sub> O               | 100.16           |
| 4.17  | Valeric acid                                     | CARBOXYLIC ACID | C <sub>5</sub> H <sub>10</sub> O <sub>2</sub>  | 102.13           |
| 4.25  | cis-4-Heptenal                                   | ALDEHYDE        | C <sub>7</sub> H <sub>12</sub> O               | 112.17           |
| 4.35  | Ethyl valerate; Ethyl pentanoate                 | ESTER           | C <sub>7</sub> H <sub>14</sub> O <sub>2</sub>  | 130.18           |
| 4.45  | Heptanal                                         | ALDEHYDE        | C <sub>7</sub> H <sub>14</sub> O               | 114.10           |
| 4.77  | Isobutyl isobutyrate                             | ESTER           | C <sub>8</sub> H <sub>16</sub> O <sub>2</sub>  | 144.21           |
| 6.35  | Hexanoic acid                                    | CARBOXYLIC ACID | C <sub>6</sub> H <sub>12</sub> O <sub>2</sub>  | 117.15           |
| 6.51  | 2-Octanone                                       | KETONE          | C <sub>8</sub> H <sub>16</sub> O               | 128.215          |
| 6.84  | 2-Octanol                                        | ALCOHOL         | C <sub>8</sub> H <sub>18</sub> O               | 130.23           |
| 7.60  | p-Methylanisole                                  | ETHER           | C <sub>8</sub> H <sub>10</sub> O               | 122.17           |
| 7.87  | 2-Ethyl-1-hexanol                                | ALCOHOL         | C <sub>8</sub> H <sub>18</sub> O               | 130.23           |
| 8.01  | Isopropyl hexanoate                              | ESTER           | C <sub>9</sub> H <sub>18</sub> O <sub>2</sub>  | 158.24           |
| 9.48  | Heptanoic acid                                   | CARBOXYLIC ACID | C <sub>7</sub> H <sub>14</sub> O <sub>2</sub>  | 130.19           |
| 9.64  | Butyl butyrate                                   | ESTER           | C <sub>8</sub> H <sub>16</sub> O <sub>2</sub>  | 144.21           |
| 10.29 | Methyl benzoate                                  | ESTER           | C <sub>8</sub> H <sub>8</sub> O <sub>2</sub>   | 136.15           |
| 11.15 | Isophorone; 3, 5, 5-Trimethyl-2-cyclohexen-1-one | KETONE          | C <sub>9</sub> H <sub>14</sub> O               | 138.21           |
| 12.80 | alpha,alpha-Dimethylphenethyl acetate            | ESTER           | C <sub>12</sub> H <sub>16</sub> O <sub>2</sub> | 192.26           |
| 13.61 | Diethyl succinate                                | ESTER           | C <sub>8</sub> H <sub>14</sub> O <sub>4</sub>  | 174.20           |
| 13.63 | Octanoic acid                                    | CARBOXYLIC ACID | C <sub>8</sub> H <sub>16</sub> O <sub>2</sub>  | 144.214          |

|       |                                                   |                 |                                                |         |
|-------|---------------------------------------------------|-----------------|------------------------------------------------|---------|
| 15.13 | trans,trans-2,4-Nonadienal                        | ALDEHYDE        | C <sub>9</sub> H <sub>14</sub> O               | 138.21  |
| 16.12 | cis-3-Hexenyl isovalerate, Hex-3-enyl isovalerate | ESTER           | C <sub>11</sub> H <sub>20</sub> O <sub>2</sub> | 184.28  |
| 20.39 | Anisyl formate                                    | ALDEHYDE        | C <sub>9</sub> H <sub>10</sub> O <sub>3</sub>  | 166.18  |
| 21.95 | 3-Phenylpropyl acetate                            | ESTER           | C <sub>11</sub> H <sub>14</sub> O <sub>2</sub> | 178.23  |
| 22.06 | Decanoic acid                                     | CARBOXYLIC ACID | C <sub>10</sub> H <sub>20</sub> O <sub>2</sub> | 172.27  |
| 24.35 | trans-Cinnamic acid                               | CARBOXYLIC ACID | C <sub>9</sub> H <sub>8</sub> O <sub>2</sub>   | 148.16  |
| 27.68 | N/A                                               | -               | -                                              | -       |
| 34.59 | gamma-Dodecalactone                               | KETONE          | C <sub>12</sub> H <sub>22</sub> O <sub>2</sub> | 198.306 |

N/A, not assigned

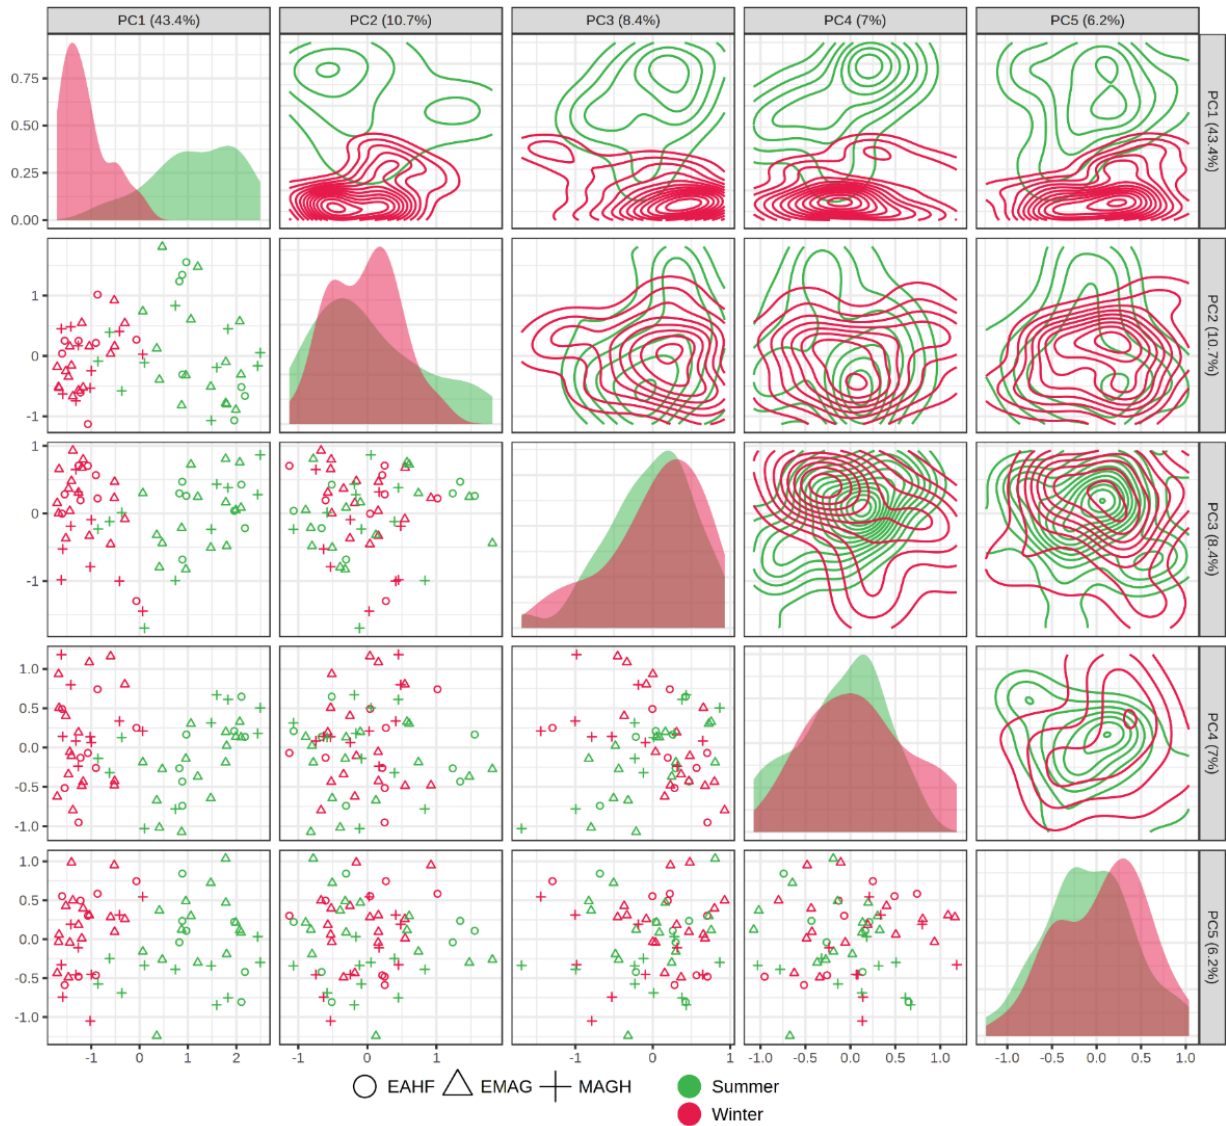

**Figure S1.** Interactive principal component analysis (iPCA) applied to raw milk VOC profiles according to the feeding systems (EMAG, ensiled maize and grass,  $\Delta$ ; EAHF, ensiled and haylage forage,  $\circ$ ; MAGH, meadow and grass hay,  $+$ ) and seasons (summer, green; winter, red). The principal components PC1 and PC2 explain the 54.3% of total variance. Contribution to the explanation of the variance was provided also by PC1-PC3 and PC1-PC4.
